# Supplementary material
Source: Springer Nature journal article supplement (https://www.springermedizin.de/resource/supplementary/12905_2008_149_MOESM5_ESM.pdf/9519260)
Supplement: MOESM5 [file 9519260]

T TGT AAT TCG T TGC GGT CAG TAAT C TTT GG ATAGC TGCTAAT

12

23

34

45

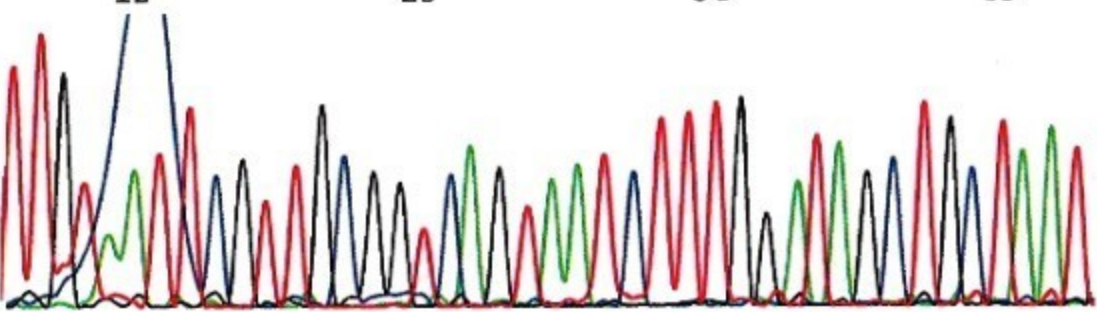

[gi|73543932|gb|DQ063734.1](#) Chlamydia trachomatis strain K/UW-31  
cryptic plasmid ORF2 gene, partial cds Length=388

Score = 85.7 bits (43), Expect = 8e-15  
Identities = 43/43 (100%), Gaps = 0/43 (0%)  
Strand=Plus/Minus

|           |                                             |     |
|-----------|---------------------------------------------|-----|
| Query 1   | TTGTAATTCGTTCCGGTCAGTAATCTTTGGATAGCTGCTAATG | 43  |
|           |                                             |     |
| Sbjct 159 | TTGTAATTCGTTCCGGTCAGTAATCTTTGGATAGCTGCTAATG | 117 |
